# Supplementary material
Source: PubMed Central journal article supplement (PMC3687033)
Supplement: NIHMS444254-supplement-Supp_Table_S1.pdf [file NIHMS444254-supplement-Supp_Table_S1.pdf]

| tooth<br>Sample | root canal<br>Volume (mm <sup>3</sup> ) | root canal<br>Length (mm) | root canal<br>Avg Radius (mm) | root canal<br>Surface Area (mm <sup>2</sup> ) |
|-----------------|-----------------------------------------|---------------------------|-------------------------------|-----------------------------------------------|
| 1               | 22.3897                                 | 23.453                    | 0.726                         | 106.93                                        |
| 2               | 23.3983                                 | 23.483                    | 0.793                         | 116.95                                        |
| 3               | 18.636                                  | 23.533                    | 0.691                         | 102.12                                        |
| 4               | 16.8185                                 | 21.741                    | 0.6084                        | 83.07                                         |
| 5               | 19.1838                                 | 21.018                    | 0.7487                        | 98.82                                         |
| 6               | 13.4259                                 | 18.43                     | 0.6084                        | 70.42                                         |
| 7               | 15.9933                                 | 16.929                    | 0.695                         | 73.89                                         |
| 8               | 15.633                                  | 20.731                    | 0.6409                        | 83.44                                         |
| 9               | 15.955                                  | 18.501                    | 0.717                         | 83.31                                         |
| 10              | 15.9605                                 | 20.56                     | 0.5175                        | 66.82                                         |
| 11              | 17.998                                  | 20.379                    | 0.7903                        | 101.14                                        |
| 12              | 16.0699                                 | 20.696                    | 0.6098                        | 79.26                                         |
| 13              | 25.2804                                 | 21.982                    | 0.7865                        | 108.57                                        |
| 14              | 24.5262                                 | 21.784                    | 0.892                         | 122.03                                        |
| 15              | 24.9262                                 | 20.152                    | 0.811                         | 102.64                                        |
| 16              | 18.2684                                 | 21.257                    | 0.746                         | 99.59                                         |
| 17              | 14.393                                  | 18.576                    | 0.8248                        | 96.22                                         |
| 18              | 19.2965                                 | 20.142                    | 0.731                         | 92.47                                         |
| 19              | 15.1052                                 | 19.094                    | 0.773                         | 92.69                                         |
| 20              | 22.9059                                 | 24.213                    | 0.9226                        | 140.29                                        |
| 21              | 19.5801                                 | 22.388                    | 0.7186                        | 101.03                                        |
| 22              | 24.5056                                 | 24.198                    | 0.8864                        | 134.7                                         |
| 23              | 16.5257                                 | 14.506                    | 0.677                         | 61.67                                         |
| 24              | 18.8256                                 | 19.068                    | 0.763                         | 91.37                                         |
| 25              | 11.7441                                 | 14.953                    | 0.6                           | 56.34                                         |
| 26              | 17.335                                  | 20.431                    | 0.7234                        | 92.82                                         |
| 27              | 13.0674                                 | 17.2                      | 0.709                         | 76.58                                         |
| 28              | 15.3495                                 | 17.07                     | 0.813                         | 87.15                                         |
| 29              | 17.2317                                 | 19.701                    | 0.856                         | 105.91                                        |
| 30              | 23.3443                                 | 22.153                    | 0.847                         | 117.84                                        |
| 31              | 18.6415                                 | 20.951                    | 0.801                         | 105.39                                        |
| 32              | 12.5728                                 | 15.512                    | 0.618                         | 60.2                                          |
| 33              | 18.3072                                 | 16.21                     | 0.8477                        | 86.29                                         |
| 34              | 11.0921                                 | 15.879                    | 0.6885                        | 68.66                                         |
| 35              | 21.97                                   | 15.848                    | 0.915                         | 91.07                                         |
